# Supplementary material for: Augmentation of nitrogen management reduce nitrogen stress and enhance productivity of super-seeder sown wheat under rice residue incorporation
Source: Research Square preprint supplement (doi:10.21203/rs.3.rs-3150157/v1), 2023-07-13
Supplement: Supplementary file 1 [file d864d33ed8833a95f6440dec.docx]

Table 1. Weekly weather condition during November 2020 to March 2021 at Pantnagar

| Month | Metro. week no. | Temperature (0C) | | Relative humidity (%) | | Rainfall (mm) | Sun- Shine Hrs. | Wind Velocity (Km/hr.) | Evap. (mm) |
| --- | --- | --- | --- | --- | --- | --- | --- | --- | --- |
| Max. | Min. | Max. | Min. |
| November | 46 | 28.5 | 11.3 | 92 | 36 | 0 | 8.1 | 1.9 | 3.0 |
| 47 | 25.1 | 8.7 | 93 | 43 | 0 | 7.5 | 2.2 | 2.9 |
| December | 48 | 25.0 | 8.6 | 94 | 42 | 0 | 6.1 | 1.0 | 2.2 |
| 49 | 25.7 | 10.1 | 94 | 50 | 0 | 6.4 | 1.3 | 2.7 |
| 50 | 20.8 | 9.7 | 93 | 67 | 2.5 | 3.3 | 3.4 | 1.7 |
| 51 | 16.0 | 4.1 | 95 | 65 | 0 | 4.1 | 2.5 | 1.0 |
| 52 | 20.8 | 4.1 | 96 | 55 | 0 | 5.4 | 1.9 | 1.5 |
| January | 01 | 20.3 | 9.2 | 94 | 62 | 18.6 | 3.1 | 2.8 | 2.1 |
| 02 | 18.7 | 8.7 | 97 | 72 | 0 | 3.9 | 5.6 | 2 |
| 03 | 18.2 | 7.5 | 96 | 69 | 0 | 3.7 | 2.7 | 1.7 |
| 04 | 16.6 | 8.8 | 96 | 75 | 0 | 4.6 | 2.8 | 1.5 |
| February | 05 | 18.8 | 6.1 | 96 | 61 | 0 | 4.5 | 1.1 | 1.8 |
| 06 | 23.7 | 7.8 | 94 | 53 | 4.6 | 6.7 | 2.8 | 2.7 |
| 07 | 25.7 | 9.0 | 91 | 45 | 0 | 7.1 | 1.4 | 2.5 |
| 08 | 26.9 | 9.9 | 89 | 48 | 0 | 6.7 | 1.8 | 2.9 |
| March | 09 | 29.3 | 11.2 | 90 | 37 | 0 | 9.2 | 5.8 | 4.2 |
| 10 | 29.6 | 14.2 | 83 | 46 | 0 | 7.6 | 3.8 | 4.2 |
| 11 | 30.3 | 13.6 | 86 | 36 | 0 | 7 | 2.5 | 3.9 |
| 12 | 32.6 | 14.1 | 82 | 27 | 0 | 8 | 4.2 | 6.1 |
| April | 13 | 36.8 | 14.0 | 61 | 14 | 0 | 7.6 | 6.2 | 7.9 |
| 14 | 36.8 | 14.0 | 61.1 | 11 | 0 | 8.8 | 3.5 | 7.2 |

Table 2. Weekly weather condition during November 2021 to April 2022 at Pantnagar

| Month | Metro. week no. | Temperature (0C) | | Relative humidity (%) | | Rainfall (mm) | Sun- Shine Hrs. | Wind Velocity (Km/hr.) | Evap. (mm) |
| --- | --- | --- | --- | --- | --- | --- | --- | --- | --- |
| Max. | Min. | Max. | Min. |
| November | 46 | 27.4 | 12.3 | 92 | 39 | 0.0 | 7.3 | 1.1 | 2.7 |
| 47 | 26.3 | 11.4 | 90 | 38 | 0.0 | 6.7 | 2.4 | 3.1 |
| December | 48 | 25.2 | 10.8 | 92 | 46 | 0.0 | 5.8 | 1.9 | 2.1 |
| 49 | 25.0 | 12.1 | 93 | 50 | 3.0 | 5.2 | 2.4 | 1.8 |
| 50 | 23.4 | 7.2 | 89 | 42 | 0.0 | 7.4 | 1.7 | 1.6 |
| 51 | 19.8 | 4.3 | 93 | 46 | 0.0 | 5.4 | 2.5 | 1.7 |
| 52 | 21.6 | 8.4 | 90 | 49 | 2.0 | 5.6 | 2.1 | 1.9 |
| January | 1 | 20.2 | 9.1 | 93 | 56 | 22.2 | 5 | 2.2 | 1.8 |
| 2 | 19.6 | 11.0 | 94 | 73 | 54.7 | 3.3 | 4.6 | 2.3 |
| 3 | 14.1 | 8.7 | 91 | 80 | 2.8 | 5.6 | 3.6 | 1.1 |
| 4 | 17.0 | 9.3 | 93 | 71 | 19.2 | 3.1 | 5.6 | 3.2 |
| February | 5 | 16.0 | 8.6 | 92 | 77 | 30.7 | 2.7 | 6.1 | 1.7 |
| 6 | 16.1 | 7.4 | 94 | 76 | 17.5 | 3.1 | 3.1 | 1.5 |
| 7 | 22.2 | 6.7 | 94 | 48 | 0 | 8.6 | 2.4 | 2 |
| 8 | 23.7 | 9.8 | 86 | 45 | 0 | 8 | 6.3 | 3.1 |
| March | 9 | 24.7 | 10.0 | 93 | 48 | 2.2 | 8 | 3.1 | 2.6 |
| 10 | 27.5 | 11.3 | 92 | 48 | 0 | 7 | 3.4 | 3.2 |
| 11 | 30.7 | 16.6 | 90 | 49 | 0 | 7.1 | 1.9 | 2.9 |
| 12 | 33.9 | 17.1 | 84 | 40 | 0 | 8.8 | 2.4 | 3.4 |
| April | 13 | 34.0 | 15.9 | 80 | 31 | 0.0 | 9.0 | 4.6 | 4.8 |
|  | 14 | 37.1 | 20.7 | 67 | 32 | 0.4 | 8.6 | 4.8 | 5.9 |

Table. 3 dry matter accumulation at 30 and 60 DAS (days after sowing) under bio-decomposer application, nitrogen level, and nitrogen split on super-seeder sown wheat

| Treatment | Dry matter (g m-2) | | | |
| --- | --- | --- | --- | --- |
| 30 DAS | | 60 DAS | |
| 2020-21 | 2021-22 | 2020-21 | 2021-22 |
| *Bio-decomposer* | | | | |
| B0 | 36a | 38a | 208a | 214a |
| B1 | 37a | 39a | 217a | 222a |
| *N-level* | | | | |
| N1 | 35b | 37b | 206b | 211b |
| N2 | 38a | 41a | 219a | 224a |
| *N-split* | | | | |
| S1 | 38a | 41a | 218a | 226a |
| S2 | 36b | 39a | 217a | 220ab |
| S3 | 35bc | 36c | 201b | 208bc |

** B0- without application of bio-decomposer; B1- with bio-decomposer application; N1- nitrogen at 150 kg ha-1; N2- nitrogen at 180 kg ha-1: S1- 50:25:25; S2- 40:30:30; S3-30:35:35 (N applied at sowing, crown root initiation, and booting). Shoot (Stem + leaf). Data in the column followed by different letters are significantly different at p≤0.05 as analysed by Tukey’s honest significant difference (Tukey’s HSD) test.*
